1 ***Local sleep during mind-wandering enhances processes of***  
2 ***spatial attention allocation***

3 ***Christian Wienke<sup>1,a</sup>, Mandy V. Bartsch<sup>3,a</sup>, Lena Vogelgesang<sup>3</sup>, Christoph Reichert<sup>2,3,4</sup>,***  
4 ***Hermann Hinrichs<sup>1,2,3,4,5</sup>, Hans-Jochen Heinze<sup>1,2,3,4,5</sup>, Stefan Dürschmid<sup>1,3,b</sup>***

5

6 **Affiliations:**

7 1. Department of Neurology, Otto-von-Guericke University, Leipziger Str. 44, 39120  
8 Magdeburg, Germany;

9 2. Forschungscampus STIMULATE, Otto-von-Guericke University, Universitätsplatz 2,  
10 39106 Magdeburg;

11 3. Department of Behavioral Neurology, Leibniz Institute for Neurobiology, Brenneckestr.  
12 6, 39120 Magdeburg, Germany;

13 4. CBBS - center of behavioral brain sciences, Otto-von-Guericke University,  
14 Universitätsplatz 2, 39106 Magdeburg, Germany;

15 5. German Center for Neurodegenerative Diseases (DZNE), Leipziger Str. 44, 39120  
16 Magdeburg;

17

18 <sup>a</sup> These authors contributed equally to this work

19 <sup>b</sup> Corresponding Author:

20 Stefan Dürschmid, Department of Behavioral Neurology, Leibniz Institute for Neurobiology,  
21 Brenneckestr. 6, 39120 Magdeburg, Germany;

22 Phone: 0049 391 626392531;

23 Email: [sduersch@lin-magdeburg.de](mailto:sduersch@lin-magdeburg.de)

24

25 **ORCIDs**

26 CW <https://orcid.org/0000-0001-9962-8823>

27 SD: <https://orcid.org/0000-0001-6686-976X>

28 MVB: <https://orcid.org/0000-0002-9276-5160>

29 CR: <https://orcid.org/0000-0002-8649-9791>

30

### 31 **Running Title**

32 Local sleep enhances spatial attention allocation

33

34

### 35 **Keywords**

36 high frequency activity, local sleep, mind wandering, N2pc, visual spatial attention

37

### 38 **Author Contributions**

39 C.W., M.V.B. and S.D. conceived and designed the experiment. C.W. collected the MEG data.

40 C.W., C.R., and S.D. analyzed the data, C.W., L.V., M.V.B., C.R., H.H., H.J.H, and S.D.

41 interpreted the data. S.D., M.V.B., and C.W. wrote the manuscript.

42

43 **Abstract**

44 Mind wandering (MW) is a subjective, cognitive phenomenon, in which thoughts move away from  
45 the task towards an internal train of thoughts, possibly during phases of neuronal sleep-like  
46 activity (local sleep, LS). MW decreases cortical processing of external stimuli and is assumed to  
47 decouple attention from the external world. Here, we directly tested how indicators of LS, cortical  
48 processing and attentional selection change in a pop-out visual search task during phases of  
49 MW. Participants brain activity was recorded using magnetoencephalography, MW was assessed  
50 via self-report using randomly interspersed probes. As expected, MW worsened performance  
51 being accompanied by a decrease in high frequency activity (HFA, 80-150Hz) and an increase in  
52 slow wave activity (SWA, 1-6Hz), consistent with the occurrence of LS. In contrast, visual  
53 attentional selection as indexed by the N2pc component was enhanced during MW with the N2pc  
54 amplitude being directly linked to participants' performance. This observation clearly contradicts  
55 accounts of attentional decoupling predicting a decrease in attention-related responses to  
56 external stimuli during MW. Together our results suggest that MW occurs during phases of LS  
57 with processes of attentional target selection being upregulated, potentially to compensate for the  
58 mental distraction during MW.

59 **Introduction**

60 Depending on the time spent awake and the richness of experiences rodents and humans enter  
61 local sleep-like states, which manifests both as high amplitude slow wave activity (SWA) in the  
62 delta/theta range (1-6Hz) and brief neuronal silencing (Vyazovskiy et al. 2011).  
63 Phenomenologically local sleep (LS) is assumed to unearth mind-wandering (MW) (Andrillon et  
64 al. 2019), during which attention shifts inwards to self-centered matters (Smallwood and Schooler  
65 2006). Both LS and MW increase behavioral errors (Carriere et al. 2008; Smallwood et al. 2008;  
66 Bernardi et al. 2015; Seli 2016; Leszczynski et al. 2017) promoting the prediction of perceptual  
67 and attentional decoupling (Schad et al. 2012; Christoff et al. 2016). The former is attested by  
68 reduced electrophysiological responses (Smallwood et al. 2008; Kam et al. 2011, 2018; Christoff  
69 et al. 2016), evidence for attentional decoupling from the environment, however, is limited  
70 (Schad et al. 2012). Importantly, since off periods (LS and MW) during waking are potentially  
71 harmful (He et al. 2011; Kucyi et al. 2013; Yanko and Spalek 2014; Brandmeyer and Delorme  
72 2018) the survival in general would be endangered if the brain's need for rest is met entirely  
73 during waking (Vyazovskiy and Harris 2013) at the expense of the ability to flexibly shift  
74 attention to key features in the environment. Still, how the brain's ability to shift attention varies  
75 during off periods (LS and MW) is unknown.

76 An established electrophysiological response attributed to the focusing of visual attention  
77 onto a target searched among distractors, the EEG component N2pc (Luck and Hillyard 1994a;  
78 Eimer 1996; Luck et al. 1997; Hopf et al. 2000; Mazza et al. 2009; Boehler et al. 2011), permits  
79 to test this variation. The N2pc is characterized by a more negative deflection at posterior EEG  
80 channels contralateral to the visual field in which the target was presented. Theoretically there are  
81 at least two principal scenarios which can be tested using the N2pc. On the one hand, the  
82 attentional decoupling account predicts that the N2pc as an index of attentional selection  
83 gradually decreases with MW. On the other hand, it could be hypothesized that the N2pc

84 increases with MW since MW and external distractors are assumed to share a common  
85 underlying mechanism (Forster and Lavie 2014; Unsworth and McMillan 2014) and the N2pc  
86 increases with an increasing amount of distracting information (Mazza et al. 2009).

87 Using the high spatiotemporal and spectral resolution of magnetoencephalographic  
88 recordings (MEG) we investigated how cortical dynamics varied with self-reports ranging from  
89 being ON (uninterrupted focus on the external environment) to OFF (MW) the task, in which  
90 subjects searched for a color-defined pop-out (target) among task-irrelevant distractors.  
91 Moreover, we hypothesized that if associated with LS, MW leads to SWA and neuronal silencing.  
92 The latter we would expect to be reflected in a reduction in high frequency activity (HFA, 80-  
93 150Hz), a correlate of population neural firing rate (Mukamel et al. 2005; Liu and Newsome  
94 2006; Manning et al. 2009; Miller et al. 2009; Ray and Maunsell 2011) and preferred proxy for  
95 asynchronous areal activation (Miller et al. 2009, 2014; Privman et al. 2013; Coon and Schalk  
96 2016; Kupers et al. 2017) ideally suited to test neuronal silencing.

97

## 98 **Materials and Methods**

99

### 100 *Participants*

101 Sixteen subjects (5 female, range: 18-39 years, *M*: 27.13, *SD*: 5.85) participated after providing  
102 their written informed consent. One subject who did not experience MW was excluded. All  
103 participants reported normal or corrected-to-normal vision and none reported any history of  
104 neurological or psychiatric disease. All recordings took place at the Otto-von-Guericke University  
105 of Magdeburg and were approved by the local ethics committee (“Ethical Committee of the Otto-  
106 von-Guericke University Magdeburg”) and each participant was compensated with money.

107

### 108 *Paradigm*

109 Participants were presented with a stimulus array of red, green, and blue grating patterns each  
110 consisting of 3 colored and 2 grey stripes viewed through a circular aperture (Fig 1). The grey  
111 stripes matched the grey of the background. While either of the green and red gratings served as  
112 target, blue gratings always served as distractor items. Stimulus arrays consisted of 18 gratings  
113 arranged in two blocks of 9 gratings left and right below the fixation cross. Presentation of search  
114 displays in the lower visual field has been shown to evoke a stronger N2pc amplitude (Luck et al.  
115 1997; Hilimire et al. 2011). Participants were instructed to keep fixation on the fixation cross  
116 located at  $1.9^\circ$  visual angle (va) above the stimulus array. The size of each grating was  $1.15^\circ$  va,  
117 distance between single gratings (edge-to-edge) was  $0.69^\circ$  va. The left and right block of gratings  
118 each had a size of  $4.83^\circ$  by  $4.83^\circ$  va, the horizontal distance between both blocks (inner edges)  
119 amounted to  $5.15^\circ$  va. Diagonal distance between the fixation cross and the center of the nearest  
120 upper grating was  $2.81^\circ$  va. Target gratings could be tilted left or right in ten steps of  $1.5^\circ$ , with  
121 the smallest tilt being  $1.5^\circ$  and the maximal tilt being  $15^\circ$  from the vertical axis. Orientation and  
122 tilt angle of the non-target and distracter gratings varied randomly. Stimulus generation and  
123 experimental control was done using Matlab R2009a (MATLAB and Statistics Toolbox Release  
124 2009, The MathWorks, Inc., Natick, Massachusetts, United States.) and the Psychophysics  
125 Toolbox (Brainard 1997; Pelli 1997; Kleiner et al. 2007). Colors were matched for isoluminance  
126 using heterochromatic flicker photometry (Lee et al. 1988).

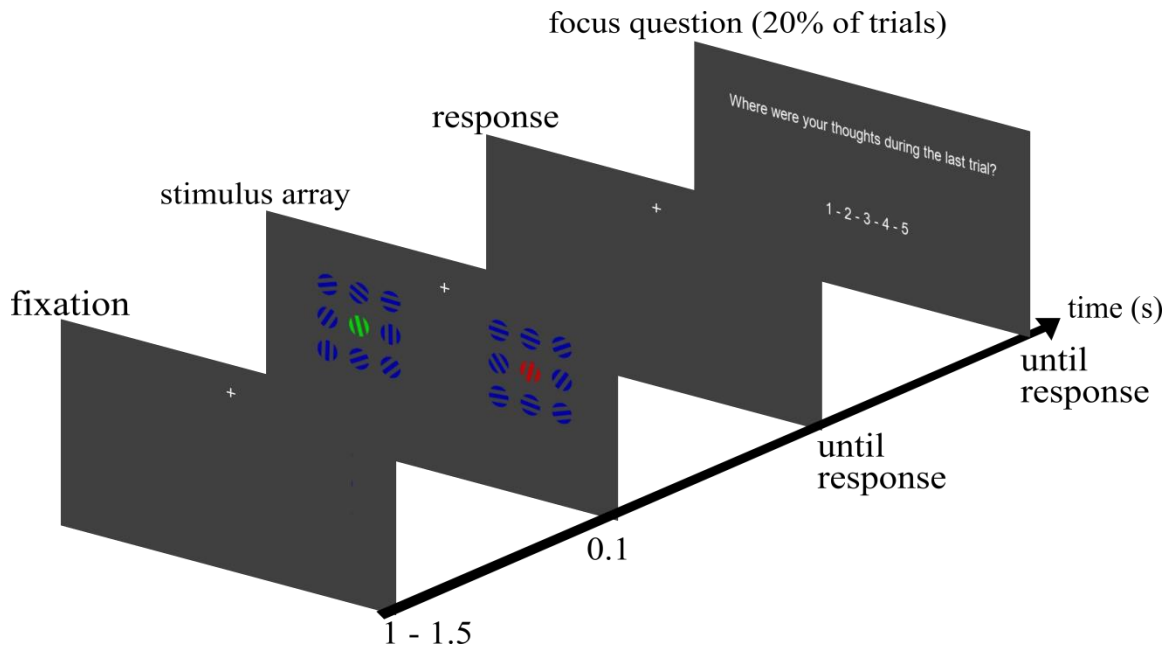

127

128 **Figure 1.** Single trial with focus question (see text for detail)

129

### 130 *Procedure*

131 At the beginning of each of the 12 blocks, participants were instructed to attend either only to the  
132 red or green grating and report via button press towards which side it was tilted (left: index finger,  
133 right: middle finger of the right hand). Target color assignment alternated blockwise. In blocks  
134 with the red grating as target the green grating served as non-target and had to be ignored and  
135 vice versa. The target could appear at each of the eighteen locations. The location of the non-  
136 target was constrained to the mirrored location in the opposite grating block to keep equal  
137 distances to the fixation cross for both target and non-target gratings. Each trial started with a  
138 fixation period of 1250 msec ( $\pm 250$ msec) before the stimulus array was presented for 100 msec.  
139 Participants were asked to respond as fast and accurately as possible. Afterwards the next trial  
140 started. The experiment started with a training block of twenty trials to familiarize participants  
141 with the procedure. After twenty consecutive trials, a blinking pause allowed participants to blink  
142 and rest their eyes. These pauses lasted seven seconds. Each block consisted of 100 trials.

143

144 *Experience sampling*

145 Throughout the experiment we delivered thought probes in pseudorandomly chosen trials (20%)  
146 asking participants to rate their attentional focus, in the period immediately prior to the probe, on  
147 a five point scale from 1 ("thoughts were anywhere else" – OFF) to 5 ("thoughts were totally at  
148 the task" – ON). Responses to focus questions were given with all five fingers of the left hand  
149 (thumb: 5, index finger: 4, middle finger: 3, ring finger: 2, little finger: 1). The probes were  
150 presented following orientation discrimination, with the restriction that two probes were separated  
151 by a minimum of one intervening search trial. The probes were initiated by an auditory stimulus  
152 (500 Hz, ca. 85 dB for 200 msec). To increase statistical power we grouped the five MW ratings  
153 in three groups of mental state (OFF: 1&2, MID: 3, ON: 4&5). Statistical analyses between  
154 mental states were performed on this subset of trials.

155

156 *MEG recording*

157 Participants were equipped with metal-free clothing and seated in a dimmed, magnetically  
158 shielded recording booth. Stimuli were presented via rear projection onto a semi-transparent  
159 screen placed at a viewing distance of 100cm in front of the participants with an LCD projector  
160 (DLA-G150CLE, JVC, Yokohama, Japan) that was positioned outside the booth. Responses were  
161 given with the left and right hand via an MEG compatible LUMItouch response system (Photon  
162 Control Inc., Burnaby, DC, Canada). Acquisition of MEG data was performed in a sitting  
163 position using a whole-head Elekta Neuromag TRIUX MEG system (Elekta Oy, Helsinki,  
164 Finland), containing 102 magnetometers and 204 planar gradiometers. Sampling rate was set to  
165 2000Hz. Vertical EOG was recorded using one surface electrode above and one below the right  
166 eye. For horizontal EOG, one electrode on the left and right outer canthus was used. Preparation  
167 and measurement took about 2 hours.



168

169 *Preprocessing and artifact rejection*

170 We used MatLab 2013b (Mathworks, Natick, USA) for all offline data processing. The 102  
171 magnetometers were involved in our analyses. All filtering (see below) was done using zero  
172 phase-shift IIR filters (4<sup>th</sup> order; filtfilt.m in Matlab). First, we filtered the data between 1 and 200  
173 Hz and used a threshold of 3pT, which the absolute MEG values must not exceed, to discard trials  
174 (-1 sec to 2 sec around stimulus onset – sufficiently long to prevent any edge effects during  
175 filtering) of excessive, non-physiological amplitude. We then visually inspected all data, excluded  
176 epochs exhibiting excessive muscle activity, as well as time intervals containing artifactual signal  
177 distortions, such as signal steps or pulses. We refrained from applying artifact reduction  
178 procedures that affect the dimensionality and/or complexity of the data like independent  
179 component analysis. Time series of remaining trials were used to characterize HFA (80-150 Hz),  
180 SWA (1-6Hz) and the N2pc (1-30Hz, main frequency range for cognitive event-related-potential  
181 (ERP) components, see (Luck 2005)). Resulting time series were used to characterize brain  
182 dynamics over the time course of visual target detection. Each trial (-1 to 2 sec around stimulus  
183 onset) was baseline corrected relative to the 200 msec interval prior to the stimulus onset.

184

185 *Statistical analysis*

186 To correct statistical significance for multiple comparisons we compared each statistical  
187 parameter against a surrogate distribution, which were constructed by randomly yoking labels of  
188 the trials and repeating the ANOVA, t-tests, and Pearson's correlation coefficient. Consequently,  
189 reported p-values represent the statistical significance relatively to the constructed surrogate  
190 distribution.

191

192 *I – Behavioral results*

193 We tested whether the ratio of ON and OFF ratings changed across the experiment to rule out the  
194 possibility that changes in cortical dynamic are a result of a change across the experiment and not  
195 of fluctuations of the mental state throughout the experiment. We divided the 12 experimental  
196 blocks in 4 parts by averaging ratings in 3 consecutive blocks since individual subjects did not  
197 make use of each of the five ratings in single blocks and compared the number of ON and OFF  
198 ratings across these 4 parts with a 4x2 ANOVA with the factors block (I,II,III, and IV) and  
199 mental state (ON vs. OFF).

200 Performance, measured as percent correct responses, was averaged across tilt angles for  
201 each subject and compared between mental states with a one-way ANOVA. Performance during  
202 focus trials was then correlated with N2pc (see below) amplitude to test whether N2pc strength  
203 predicts performance.

204 Reaction times (RTs) were grouped for the three mental states and averaged across  
205 subjects. The averaged RTs were then compared using a one-way ANOVA with the factor  
206 mental state (OFF, MID, ON).

207

## 208 *II – HFA response (neuronal silencing)*

209 We then obtained the HFA response. For each trial we band-pass filtered each magnetometer's  
210 time series in the broadband high frequency range (80-150 Hz). We obtained the analytic  
211 amplitude  $A_f(t)$  of this band by Hilbert-transforming the filtered time series. In the following,  
212 HFA refers to this Hilbert transform. We smoothed the HFA time series such that amplitude value  
213 at each time point  $t$  is the mean of 25 msec around each time point  $t$ . We then baseline-corrected  
214 by subtracting from each data point the mean activity of the 200 msec preceding the stimulus  
215 onset in each trial and each channel. We then identified stimulus-responsive channels showing a  
216 significant (compared to an empirical distribution, see below) amplitude modulation in the HFA  
217 following the onset of the visual search array. We first calculated the average activity modulation

218  $\bar{A}_{HFA}$  averaged across the 300 msec following the stimulus onset from which we subtracted the  
219 baseline activity  $\bar{B}_{HFA}$  preceding the stimulus onset. The difference between  $\bar{B}$  and  $\bar{A}$  was  
220 compared against a surrogate distribution. In each iteration, time series of each channel were  
221 circularly shifted between -500 msec and 300 msec separately, and new (surrogate) trial averages  
222 ( $\bar{B}$  and  $\bar{A}$ ) were calculated. Channels exceeding the 97.5<sup>th</sup> percentile of the channel specific  
223 surrogate  $\bar{A}_{HFA} - \bar{B}_{HFA}$  distribution were classified as showing a significant HFA modulation  
224 following stimulus onset. Second, to test for HFA differences between mental states, a one-way  
225 ANOVA (OFF, MID, ON) was conducted at each time point between 100 msec pre- and 500  
226 msec post-stimulus. The F-value of the main effect “mental state” parameterizes neuronal  
227 silencing in the HFA response, with high F-values indicating a large difference in HFA amplitude  
228 between mental states. To set a threshold for significant difference, an empirical distribution of  
229 the main effect was constructed by randomly reassigning the labels (OFF – MID – ON) to the  
230 single trials in 1000 permutations. Peak responses (maximal average HFA response following  
231 stimulus onset) in each of the mental states were compared against a surrogate distribution. In  
232 each iteration, time series of each channel were circularly shifted time series of participants  
233 between -500 msec and 300 msec separately, and new (surrogate) trial averages were calculated.  
234 From these trial averages we calculated the peak value in the time range of 0 to 300 msec  
235 following stimulus onset. Mental states exceeding the 97.5<sup>th</sup> percentile were classified as showing  
236 significant HFA modulation.

237

### 238 *III – High amplitude slow wave oscillation*

239 For each trial we band-pass filtered each magnetometer’s time series in the frequency range of  
240 slow wave oscillations (1-6 Hz) and z-scored the obtained analytic amplitude  $A_f(t)$  of this band  
241 by Hilbert-transforming the filtered time series. In the following, SWA refers to this Hilbert  
242 transform. We then counted the number of peaks of the SWA defined as local maxima exceeding

243 3 SD in each trial at each channel. Next, we identified channels with a high number of SWA  
244 peaks. To this end we compared the average number of SWA peaks across subjects against a  
245 surrogate distribution. In each of 1,000 iterations we randomly exchanged channel labels in each  
246 subject and new (surrogate) channel averages were calculated across participants. Channels  
247 exceeding the 97.5<sup>th</sup> percentile of the channel specific surrogate distribution were classified as  
248 showing a significant SWA modulation following stimulus onset (SWA channels). The number  
249 of SWA peaks were averaged separately for the three mental states across SWA channels in each  
250 participant. We then carried out a one-way ANOVA with factor mental state (OFF – MID – ON)  
251 at each time point, with single participants as random variable. The F-value of the main effect  
252 “mental state” parameterizes the occurrence of SWA with high F-values indicating a large  
253 difference in the number of SWAs between mental states. To set a threshold for significant  
254 difference, an empirical distribution of the main effect was constructed by randomly reassigning  
255 the labels (OFF – MID – ON) to the single trials in 1000 permutations.

256

257 *IV – N2pc*

258 The N2pc was calculated from the subset of trials in which a focus question was presented. First,  
259 using t-tests, we compared for each subject the magnetic response (1-30Hz) at each sensor for  
260 targets in the left visual field (LVF) vs targets in the right visual field (RVF) at each time point,  
261 irrespective of target color and distance to fixation cross. Subtracting the RVF response from the  
262 LVF response, as done by the t-test, removes activity that is solely based on sensory processes  
263 since all trials contain a red and a green pop-out grating (Hopf et al. 2000). From these  
264 distributions of t-values, occipito-temporal sensors showing maximal positive and maximal  
265 negative t-values in the time range from 200 msec to 300 msec post-stimulus were then selected  
266 individually for each subject on each hemisphere. These two channels on each hemisphere were  
267 then combined by subtracting the response of the influx-channel from the efflux-channel

268 ( $\text{Max}_{\text{positive}} - \text{Max}_{\text{negative}}$ ) separately for targets in the LVF and RVF. The N2pc for each hemisphere  
269 was finally extracted from this combined signal by subtracting the average for targets in the RVF  
270 from the average for targets in the LVF. Using the individually selected sensors we then extracted  
271 the N2pc for the three mental states accordingly.

272 To rule out hemispherical differences in N2pc amplitude, we conducted a t-tests at every  
273 time point between the N2pc elicited over left and right hemisphere. Results were compared  
274 against a distribution derived from randomly reassigning the sides and repeating the t-test in 1000  
275 iterations. To anticipate, our time resolved t-test did not reveal differences between hemispheres  
276 hence we collapsed N2pc responses across hemispheres. In the next step we tested whether the  
277 N2pc was significantly elevated over baseline. We baseline-corrected the N2pc time series of  
278 each subject by subtracting from each data point the mean activity of the 200 msec preceding the  
279 stimulus onset. We then tested whether the average N2pc shows a significant (compared to an  
280 empirical distribution, see below) amplitude modulation following the onset of the visual search  
281 array. We first calculated the average activity modulation  $\bar{A}_{N2pc}$  averaged across the 200-300  
282 msec following the stimulus onset from which we subtracted the baseline activity  $\bar{B}_{N2pc}$   
283 preceding the stimulus onset. The difference between  $\bar{B}$  and  $\bar{A}$  was compared against a surrogate  
284 distribution. In each iteration, time series of each subject were circularly shifted between -500  
285 msec and 300 msec separately, and new (surrogate) trial averages ( $\bar{B}$  and  $\bar{A}$ ) were calculated.  
286 Time points exceeding the 97.5<sup>th</sup> percentile of the channel specific surrogate  $\bar{A}_{N2pc} - \bar{B}_{N2pc}$   
287 distribution were classified as showing a significant N2pc modulation following stimulus onset.  
288 The first time point of significant N2pc modulation in each subject was used as N2pc onset.  
289 Using a time point – by – time point ANOVA between -100 and 600 msec with the factor mental  
290 state (OFF, MID, ON) we tested whether the N2pc differs between focus conditions. The F-value  
291 of the main effect “mental state” parameterizes the variation of the N2pc as a function of mental

292 states with high F-values indicating a large difference in N2pc amplitude between mental states.  
293 To set a threshold for significant difference, an empirical distribution of the main effect was  
294 constructed by randomly reassigning the labels (OFF – MID – ON) to the single trials in 1000  
295 permutations.

296

### 297 *VI – Local sleep-N2pc correlation*

298 First, HFA and N2pc onset times were compared via t-test to analyze temporal discrimination  
299 between both. Second, to examine the interaction between HFA and N2pc over the different  
300 mental states, HFA and N2pc time series were averaged separately for the three mental states in  
301 each participant for the interval between onset and offset (interval between significant elevation  
302 over baseline). We then carried out a two-way ANOVA with factor MEG response (N2pc – HFA)  
303 and mental state (OFF – MID – ON) at each time point, with single participants as random  
304 variable. Third, for each mental state N2pc (averaged across the interval of significant amplitude  
305 modulation for all trials) was correlated with HFA response (averaged across the interval of  
306 significant amplitude modulation for all trials). The resulting Pearson's correlation values were  
307 tested against a surrogate distribution. This surrogate distribution was constructed by randomly  
308 assigning the HFA values of each participant with the N2pc values from another participant in  
309 1000 iterations.

310

### 311 **Results**

312 *I – Behavioral results:* MW ratings differed in frequency ( $F_{2,42} = 10.11, p < 0.001$ ; ON 51.25%  
313 ( $SD$ : 27%), MID 33.1% ( $SD$ : 18.7%), and OFF 15.67% ( $SD$ : 16.8%); **Fig. 2A**) with more ON  
314 than MID ratings ( $t_{14} = 2.21, p = .035$ ) and more MID than OFF ratings ( $t_{14} = 2.56, p = 0.016$ ).  
315 The ratio of ratings did not vary across blocks: main effect of block ( $F_{3,112} = 0.03, p = .99$ ) and  
316 interaction ( $F_{3,112} = 0.6; p = .6$ ) were not significant (**Fig. 2A**). While ON ratings did not vary

317 across blocks (all  $p$ 's > .1), OFF ratings increased from block I to II ( $t_{14} = 2.5$ ;  $p = .02$ ) but  
 318 remained constant afterwards. Performance varied with mental state ( $F_{2,42} = 5.14$ ,  $p = .01$ ) with  
 319 worse performance during OFF trials ( $M$ : 70.2%,  $SD$ : 18.8%) than during MID trials ( $M$ : 80.2%,  
 320  $SD$ : 7%;  $t_{14} = 2.62$ ,  $p = .01$ ) or ON trials ( $M$ : 84.7%,  $SD$ : 7%;  $t_{14} = 2.09$ ,  $p = .03$ ). No differences  
 321 were observed between ON and MID trials ( $t_{14} = 1.76$ ,  $p = .1$ ; **Fig. 2B**). Also, reaction times  
 322 differed significantly between mental states ( $F_{2,42} = 2.75$   $p = 0.0031$ ) with slower RTs during OFF  
 323 ( $M$ : 898 msec,  $SD$ : 1028 msec) compared with ON ( $M$ : 433 msec,  $SD$ : 146 msec;  $t_{14} = 1.72$ ,  $p =$   
 324 .04), a trend of statistical significance between OFF and MID trials ( $M$ : 489 msec,  $SD$  212 msec;  
 325  $t_{28} = 1.48$ ,  $p = .07$ ), but no differences between ON and MID trials ( $t_{28} = 0.87$ ,  $p = .38$ ; **Fig. 2D**).  
 326

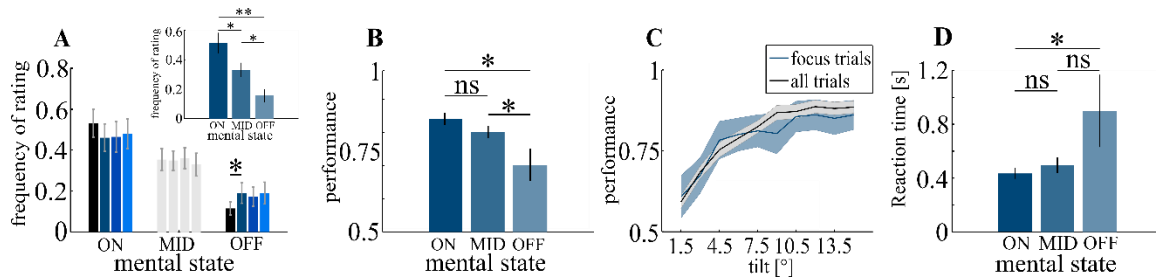

327

328 **Figure 2.** Behavioral data, **A**: participants made more ON and MID than OFF ratings (small inset). Only between the  
 329 first and the second quarter of the experiment was a significant increase in OFF ratings, which then remained constant.  
 330 **B**: subjects made more errors during OFF trials than during ON and MID trials. **C**: performance varied between tilt  
 331 angles across all trials (black) and across the subset of trials after which a focus question was presented (blue). **D**:  
 332 Reaction times were significantly longer in OFF vs. ON trials. Errorbars and shaded areas represent the standard error  
 333 of the mean (SEM). \*  $p < 0.05$ , \*\*  $p < 0.01$

334

### 335 II – HFA response (neuronal silencing)

336 15 occipital magnetometers showed stimulus response in the HFA between 81 and 234 msec  
 337 post-stimulus ( $HFA_{max} = 1.24$ fT at 161 msec,  $p < .001$ , **Fig. 3A,B,C**). The HFA differed between  
 338 mental states between 145 and 171 msec post-stimulus ( $F_{crit} = 2.74$ ;  $F_{max} = 3.18$  at 151msec,  $p =$

339 .02, **Fig. 3D**) with smaller HFA in OFF ( $M: .47fT$ ,  $SD: .93fT$ ) vs. ON ( $M: 1.24fT$ ,  $SD: .82fT$ ;  $t_{14}$   
340 = 2.16,  $p = .02$ ) and vs MID trials ( $M: 1.25fT$ ,  $SD: 1.28fT$ ;  $t_{14} = 2.04$ ,  $p = .03$ ) but no difference  
341 between ON and MID ( $t_{14} = 0.53$ ,  $p = .69$ ). Importantly, in contrast to ON (critical peak amplitude  
342 =  $.63fT$ ,  $HFA_{max} = 1.29fT$  at 149 msec;  $p < .001$ ) and MID trials ( $HFA_{max} = 1.33fT$  at 152 msec;  $p$   
343  $< .001$ ), HFA did not show significant peak response in OFF trials indicating that HFA  
344 completely vanished ( $HFA_{max} = .5fT$  at 151 msec,  $p = .15$ ).

345

### 346 *III – High amplitude slow wave oscillations*

347 28 MEG sensors covering a frontal-parietal ( $N_{crit} = .3Hz$ ;  $N_{SWA} = .43Hz$ ;  $p < .0001$ ) and an  
348 occipital channel cluster ( $N_{SWA} = .38$ ;  $p < .0012$ , **Fig. 3E**) showed a significant number of SWA.  
349 In frontal-parietal sensors we observed a trend towards differences in frequency of SWA between  
350 mental states ( $F_{2,42} = 2.7$ ;  $p = .07$ , **Fig 3E**), but a highly significant difference in occipital sensors  
351 ( $F_{2,42} = 5.9$ ;  $p < .0001$ , **Fig 3E**) with more SWA peaks in OFF ( $N_{SWA} = .51$ ) vs ON ( $N_{SWA} = .27$ ;  $t_{14}$   
352 = 3.4;  $p = .004$ ) and vs MID trials ( $N_{SWA} = .25$ ;  $t_{14} = 2.6$ ;  $p = .02$ ) in the occipital region.



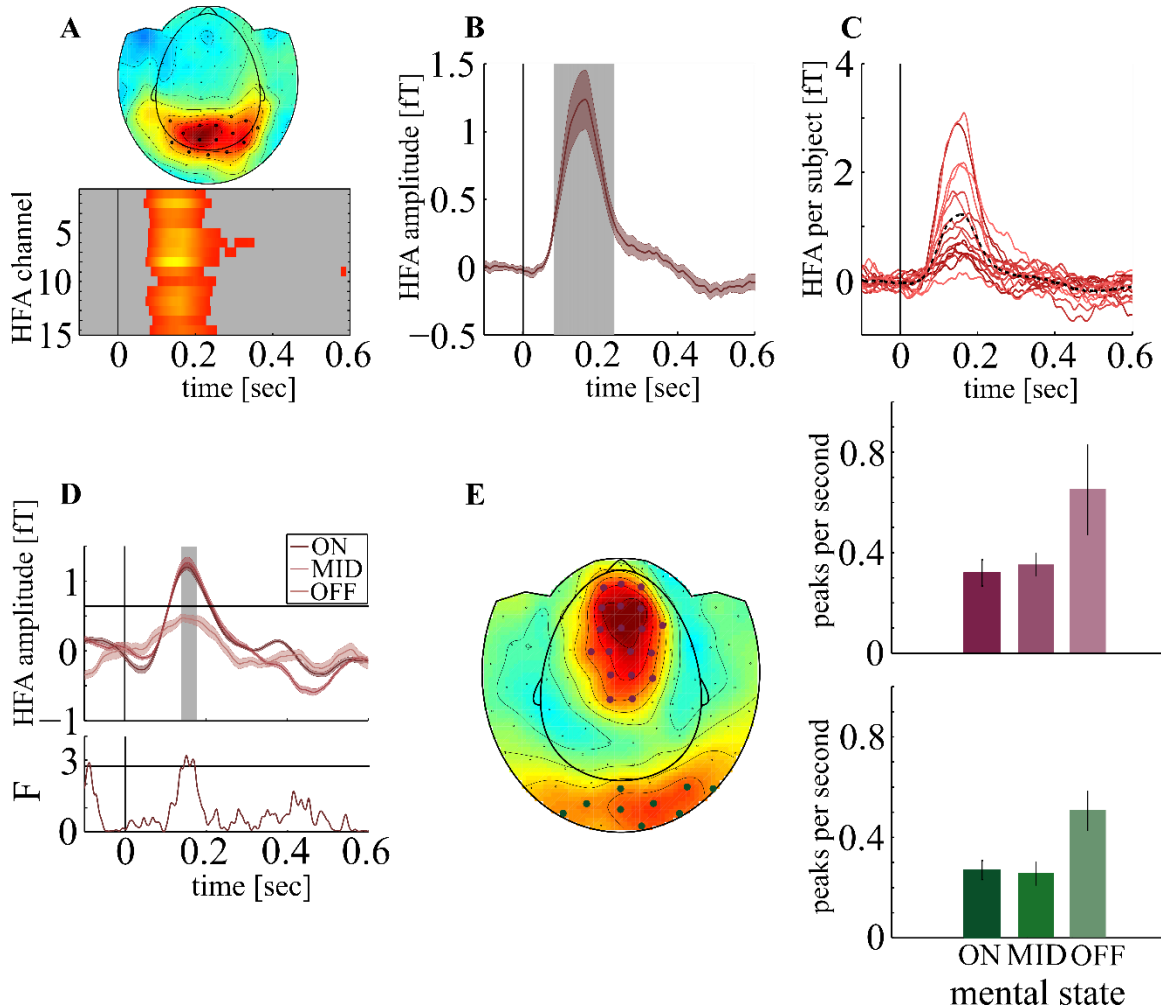

353

354 **Figure 3:** HFA **A:** Grand Average ERMF (80-150Hz) averaged across all focus trials and subjects between 100 and  
 355 200 msec post-stimulus (top) shows 15 occipital sensors with significant response after stimulus onset. HFA onset and  
 356 time course (bottom) are highly similar. **B:** Averaged across all trials and subjects, we found a HFA between 81 and  
 357 234 msec post-stimulus (gray inset). **C:** HFA response averaged across significant sensors for each subject. Dotted  
 358 black line represents average across subjects. **D top:** HFA for each mental state, averaged across subjects. Gray inset  
 359 represents time of significant differences in amplitude between mental states. Horizontal line represents critical peak  
 360 amplitude modulation. **D Bottom:** Time course of F-values. Horizontal line represents critical F-value for statistical  
 361 significance. **E:** 28 Sensors showed significant SWA (left). The Number of SWA peaks in occipital sensors (green,  
 362 lower right) was significantly elevated during OFF trials (red: frontal sensors).  
 363 Vertical lines represent stimulus onset. Shaded Areas around curves represent SEM.

364

365 *IV – N2pc*

366 Attentional target selection elicited an N2pc between 179 and 319 msec post-stimulus ( $N2pc_{crit} =$   
367  $4fT$ ,  $N2pc_{max} = 61.7fT$  at 258 msec,  $p < .001$ ; **Fig. 4A,B**) with no differences between  
368 hemispheres ( $t_{crit} = \pm 2.74$ ,  $t_{max} = -1.74$  at 71 msec,  $p = .94$ ). The N2pc differed between mental  
369 states between 213 and 298 msec post stimulus ( $F_{crit} = 3.53$ ,  $F_{max} = 7.62$  at 256 msec post-  
370 stimulus,  $p < .001$ ; **Fig 4C**, ) with a larger amplitude in OFF ( $M: 78.69fT$ ,  $SD: 46.16$ ) vs MID ( $M:$   
371  $50.65fT$ ,  $SD: 28.89$ ;  $t_{14} = 3.44$ ,  $p = 0.01$ ) and vs ON ( $M: 38.82fT$ ,  $SD: 19.73$ ;  $t_{14} = 4.1$ ,  $p = .002$ )  
372 but no significant difference between ON and MID trials ( $t_{14} = 0.39$ ,  $p = .69$ ).

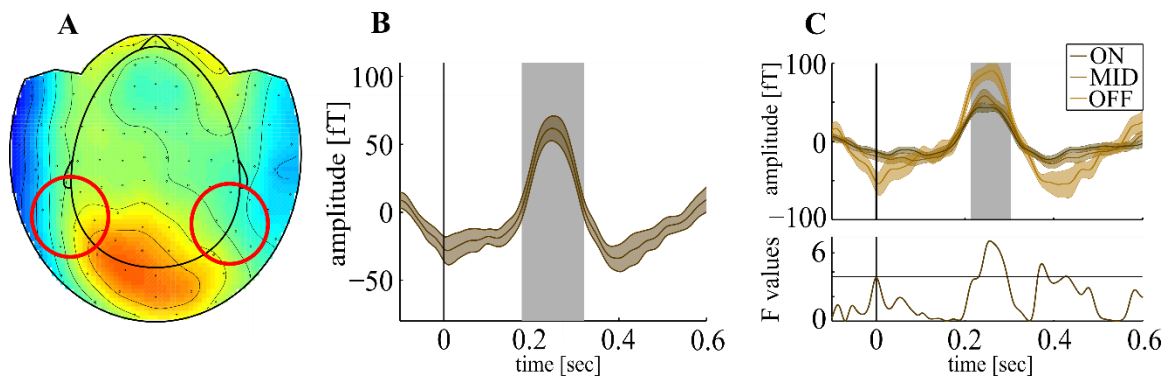

373

374 **Figure 4:** N2pc **A:** Grand average event related magnetic field (ERMF; 1-30Hz) averaged across analyzed trials  
375 between 200 and 300 msec post-stimulus. Circles represent probable location of underlying dipoles. **B:** N2pc averaged  
376 across analyzed trials and subjects. We found a significant N2pc between 179 and 319 msec post-stimulus (gray inset).  
377 **C top:** N2pc for each mental state, averaged across subjects. We found significant differences in N2pc amplitude  
378 between mental states (gray inset) between 213 and 298 msec post-stimulus. **C Bottom:** time course of F-values.  
379 Horizontal line represents critical F-value.

380 Vertical lines represent stimulus onset. Shaded areas around curves represent SEM.

381

382 *V – Local sleep-N2pc correlation*

383 The number of SWA peaks correlated with the N2pc in OFF trials both in the fronto-parietal and  
384 the occipital channel cluster ( $r_{crit} = .53$ , fronto-parietal:  $r = .71$ ;  $p = .0044$ ; occipital:  $r = .6$ ;  $p =$   
385  $.014$ ) but not in ON or MID trials ( $r$  values range between  $-.04$  to  $.45$ ;  $p > .025$ , **Fig 5A**).

386 Importantly, the HFA (reflecting initial visual response) showed a significantly earlier onset than  
 387 the N2pc (HFA: 83 msec post-stimulus, SD: 14 msec; N2pc: 198 msec post-stimulus, SD: 17  
 388 msec;  $t_{14} = 20.1, p < .001$ , Fig 5B, left). Average HFA and N2pc showed a strong interaction with  
 389 mental states with the N2pc increasing with decreasing HFA ( $F_{2,87} = 11.17, p < .001$ ; Fig 5B,  
 390 right). Similarly to SWA, only in OFF trials HFA correlated with the N2pc ( $r_{crit} = \pm.42, r = -.54$ ,  
 391  $p = .04$ ), indicating that a low HFA amplitude is associated with an increased N2pc amplitude but  
 392 not in ON ( $r = .07, p = .71$ ) or MID trials ( $r = .31, p = .27$ , Fig 5C). This enhancement of the  
 393 N2pc appeared to be behaviorally relevant as in OFF trials, the N2pc was correlated to  
 394 performance ( $r_{crit} = \pm.53, r = .57, p = .02$ ) but not in ON ( $r = -.14, p = .29$ ) or MID trials ( $r = -.11$ ,  
 395  $p = .33$ ; Fig 5D).

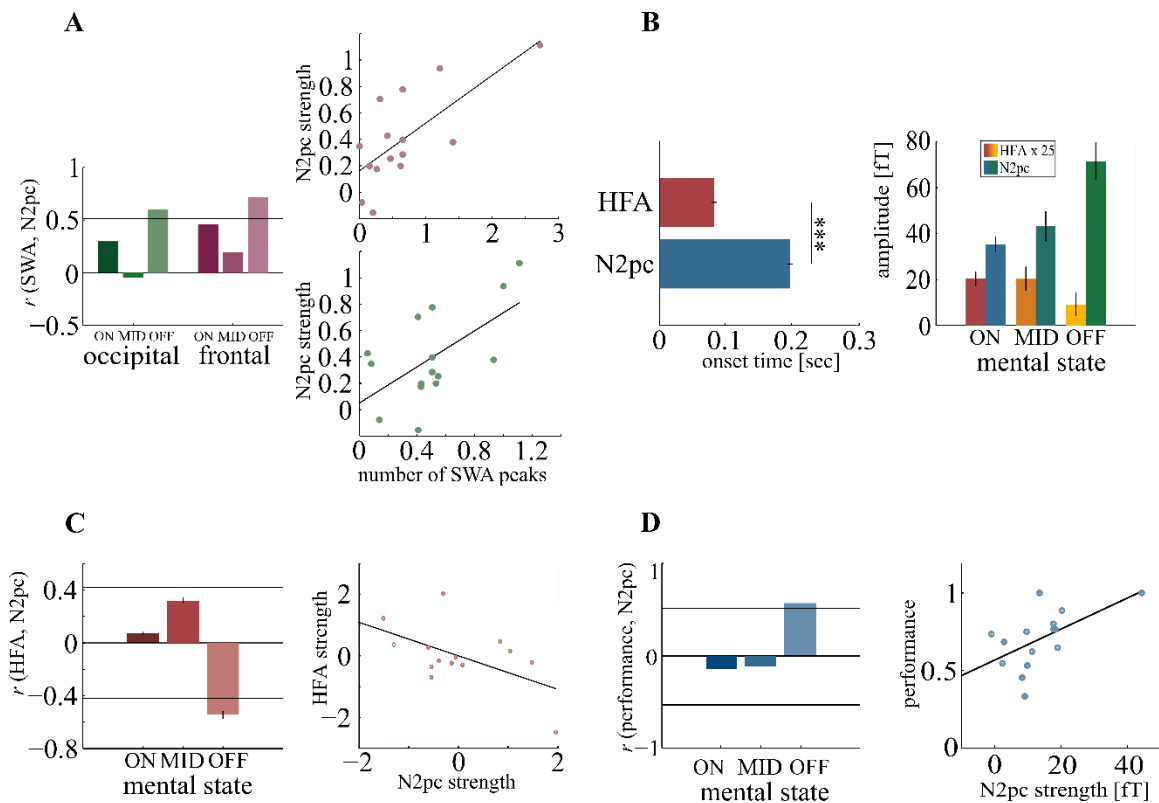

396  
 397 **Figure 5:** Local sleep-N2pc correlation **A:** Correlation between SWA count and N2pc amplitude was significant only  
 398 during OFF trials. Horizontal line represents critical correlation value (left). Scatterplots showing the correlation  
 399 between SWA count and N2pc for OFF trials in frontal (red, upper) and occipital sensors (green, lower)(right). **B:**

400 Onset times for HFA and N2pc differed significantly (left). Average HFA and N2pc amplitude for each mental state.  
401 Note that the HFA is scaled up in this plot to compensate for lower amplitudes (right). **C:** Correlation between HFA  
402 and N2pc reached significance only during OFF trials. Horizontal lines represent critical correlation values (left).  
403 Scatterplot showing the correlation between HFA and N2pc during OFF trials (right). **D:** Correlation between  
404 performance and N2pc reached statistical significance only during OFF trials. Horizontal lines represent critical  
405 correlation values (left). Scatterplot showing the correlation between performance and N2pc strength during OFF trials  
406 (right).

407 Errorbars represent the SEM. \*\*\*  $p < .001$

408

## 409 **Discussion**

410

411 We examined the role of local sleep (operationalized as HFA reduction and SWA increase) in the  
412 generation of MW, and its impact on spatial attentional allocation. Participants performed a visual  
413 search paradigm, yielding robust increases in the HFA response in occipital MEG sensors,  
414 followed by the N2pc responses reflecting target selection. When subjects subjectively  
415 experienced MW, the HFA response vanished corroborating neuronal silencing (Vyazovskiy et  
416 al. 2011) and establishing a direct link between local sleep and MW. In parallel, the number of  
417 SWA periods increased with MW, consistent with participants experiencing phases of local sleep.  
418 In line with previous studies, performance decreased with manual reaction times being  
419 substantially prolonged during MW. In contrast, neural markers of attentional selection were even  
420 more pronounced during MW and closely linked to behavioral responses. That is, even though  
421 low in performance during OFF trials, subjects showing a higher N2pc amplitude performed  
422 better than those with a less pronounced N2pc. In general, during MW and commensurate with  
423 signatures of local sleep, processes of attentional target selection, as indexed by the N2pc, rather  
424 increased potentially compensating for mental distraction.

425 Grating stimuli reliably evoked high frequency activity in our non-invasive MEG  
426 recordings strongly resembling HFA responses in intracranial recording with a modulation over

427 baseline between 50 and 350 Hz, a fast increasing flank peaking around 200 msec, and a slowly  
428 decreasing flank in early visual cortex (Burke et al. 2014; Szczepanski et al. 2014; Golan et al.  
429 2016, 2017; Gerber et al. 2017; Helfrich et al. 2018; Bartoli et al. 2019). The high similarity of  
430 the HFA response across subjects indicates that MEG in contrast to EEG can reliably pick up  
431 high frequency activity responses to visual stimuli which even has been shown at the single trial  
432 level (Westner et al. 2018).

433 HFA reduction during MW might not result from attentional decoupling but rather  
434 reflects neuronal silencing. Previous studies showed reduced electrophysiological responses  
435 during MW (Christoff et al. 2016) potentially due to attentional decoupling during MW without  
436 deciphering the causal relation between MW and reduced cortical responses. It is assumed that  
437 MW attenuates the cortical response (Christoff et al. 2016) – the HFA – since attentional  
438 resources are shifted inwards (Smallwood and Schooler 2006) in line with an attentional  
439 decoupling account. However, we hypothesize that participants experience MW, since use-  
440 dependent neuronal silencing reduces sensory representation of the visual environment in the first  
441 place for the following reasons. First, any attentional reduction of the HFA should also  
442 predominantly be found in fronto-parietal structures (Szczepanski and Kastner 2013; Szczepanski  
443 and Knight 2014; Perrone-Bertolotti et al. 2020) where we did not find any strong stimulus-  
444 driven modulation in our study. Second, and most importantly, attentional modulation of cortical  
445 responses are amply attested with a reduction of responses (Smallwood et al. 2008; Kam et al.  
446 2011, 2018) often using a contrast between task relevant vs. irrelevant stimuli (Müsch et al.  
447 2014). But task-irrelevant stimuli evoked a comparable HFA response even though smaller in  
448 amplitude. Also, in audition even though ignoring the stimulation and attending a second task  
449 clear stimulus-driven responses can be seen in frontal and temporal cortex (Dürschmid et al.  
450 2016). Hence, although modulated by attention, ERPs and HFA response in previous studies were  
451 preserved. In contrast, we found HFA increase in occipital MEG sensors onsetting as early as ~90

452 msec and, most importantly, during MW the HFA vanishes. Hence, HFA reduction is most likely  
453 not driven by attention but rather corresponds with neuronal silencing (Vyazovskiy et al. 2011)  
454 reflecting local sleep.

455         Importantly, only local sleep would potentially allow for independent regulation of  
456 attentional resources while a global state change would downregulate attentional resources  
457 concomitantly. Hence, the strong interaction between N2pc and HFA speaks in favor of brief  
458 periods of local sleep as single units usually do only during NREM sleep (Vyazovskiy et al. 2011;  
459 Siclari et al. 2017) even in the absence of signs of drowsiness. The HFA, a localized index of  
460 functionally selective activity (Crone et al. 1998; Miller et al. 2007) and most likely reflecting  
461 multi-unit activity vanishes during MW in regions strongly responding to stimulation. In addition,  
462 in sleep restricted humans waking EEG typically shows increased low-frequency power (slow  
463 wave activity – SWA) reflecting the duration of prior wakefulness (Finelli et al. 2000; Leemburg  
464 et al. 2010; Vyazovskiy et al. 2011) and a homologue phenomenon to silencing neurons in brain  
465 regions disproportionately used during waking (Rector et al. 2009), and involved in prior learning  
466 (Hung et al. 2013). Both strong signatures of local sleep – i.e., HFA reduction and SWA increase  
467 – did not overlap spatially but occurred locally (Belleli et al. 2014), which points at different  
468 functions.

469         SWA could serve as a carrier wave that allows or drives the transfer of information  
470 between structures such as the hippocampus and neocortex and occurred over centro-parietal,  
471 sensory and motor areas regions relative to the rest of the brain in a previous study (Castelnovo et  
472 al. 2016). In line with previous results, we found an increase in centro-parietal and in occipital  
473 cortex. The parallel SWA increase between these regions argues strongly for a common plasticity  
474 dependent component to sleep regulation (Murphy et al. 2011). Importantly, these signatures of  
475 local sleep occur even in subjects which are not sleep deprived (Quercia et al. 2018) and SWA,  
476 indicating sleep need (Huber et al. 2004), varies locally in time, since subjective ON and OFF

477 periods were reported comparably distributed across the entire experiment. Hence, we can rule  
478 out the possibility that both signatures of LS only increase with time and thus without any strong  
479 relation to MW.

480 Local sleep periods are of behavioral relevance since they are associated with cognitive  
481 lapses (Nir et al. 2017) marked by prolonged reaction times (Bernardi et al. 2015; Nir et al. 2017),  
482 probably due to reduced stimulus-triggered activity in visual areas causing a lower-quality  
483 perceptual representation of the target stimulus (Weissman et al. 2006). Consistent with subjects  
484 experiencing attentional lapses, we also found reaction times to be substantially longer during  
485 MW. The observed motor slowing might in part explain behavioral errors in previous studies on  
486 MW as well. MW manifests behaviorally especially in highly automated task like reading or the  
487 Sustained-Attention-to-Response-Task (SART)(Smallwood et al. 2008; Seli 2016) hence  
488 behavioral decrements in SART experiments could result from a slowing of a general control of  
489 manual responses which could hypothetically be beneficial to prevent from overhasty decisions  
490 when sensory evidence is low. The important finding is that even though low in performance,  
491 subjects with stronger N2pc perform better underscoring the behavioral relevance of upregulation  
492 of attentional resources when sensory evidence is low.

493 Indeed, our major finding is that during local sleep the strength of SWA and neuronal  
494 silencing predicts how attentional reallocation is modulated. Previously, MW was found to  
495 positively correlate with task-irrelevant distraction indicating that MW reveals individual  
496 susceptibility to task-irrelevant distraction including both internal and external sources (Forster  
497 and Lavie 2014). Specifically, it was suggested that MW and external distraction reflect distinct,  
498 yet correlated constructs related to working memory (Unsworth and McMillan 2014). Hence, the  
499 N2pc increase is in line with previous studies showing that target-distractor disambiguation  
500 increases with distractor load (Mazza et al. 2009) and suggesting a stronger influence of  
501 distractors under momentary attention lapses (Weissman et al. 2006). These results indicate that

502 MW does not inflict attentional decoupling (Smallwood and Schooler 2006). Given the earlier  
503 onset of HFA compared to the N2pc, the reduction in HFA during MW (worse stimulus  
504 representation) might consequently lead to the upregulation of the N2pc (more target  
505 enhancement and/or distractor suppression needed). Since experience sampling can only be  
506 applied in a subset of trials, a trial-wise measure of MW cannot be provided. Hence, we cannot  
507 dissolve the number of trials by which neuronal silencing is ahead the N2pc upregulation.

508         The N2pc was originally interpreted as suppression of distractors (Luck and Hillyard  
509 1994b), but others argued that the N2pc reflects target enhancement (Eimer 1996) and is now  
510 considered a composition of overlapping processes of both target processing (target negativity,  
511 Nt) and distractor suppression (distractor positivity, Pd) (Hickey et al. 2009; Hilimire et al. 2012;  
512 Gaspar and McDonald 2014). Since we presented the target simultaneously with a color pop-out  
513 non-target in the opposite visual field, both the target selection (Nt contralateral to the target) as  
514 well as distractor suppression (Pd contralateral to the pop-out non-target) will contribute to the  
515 amplitude of the observed N2pc waveform. Importantly, we observed an enhanced N2pc when  
516 the subjects were in a state of MW. Since our stimuli always contained both laterally presented  
517 targets and distractors, we cannot unambiguously decide as to whether the enhanced N2pc was  
518 caused by a stronger target enhancement, increased distractor suppression, or both, or whether the  
519 N2pc is rather generally suppressed in the focused state. In general, the N2pc component seems  
520 to strongly depend on stimulation parameters, showing larger activation differences between  
521 hemispheres when more than one item per visual field is presented, the task requires a complex  
522 feature discrimination (compared to a simple feature detection) and the target is in the lower  
523 visual field (Luck et al. 1997). Hence, we chose our visual search display accordingly to  
524 maximize the observed N2pc amplitudes with the target being located in the lower visual field,  
525 multiple surrounding irrelevant distractor items, and a discrimination task requiring high spatial  
526 scrutiny. Most importantly, the target was always an easily detectable color pop-out item,



527 requiring no time-consuming search process that might have smeared out N2pc responses over  
528 time. In fact, the N2pc was elicited at the expected time range of 200 msec irrespective of mental  
529 state. That is, the initial target selection was not delayed under conditions of MW. Still, there was  
530 a substantial increase in response time (about 400msec), when subjects reported to be “OFF task”  
531 which might have reflected a delayed processing of the information provided by the N2pc, or  
532 could be caused by parallel interfering processes of MW. In fact, only when participants  
533 experienced MW (OFF task), the amplitude of the N2pc was positively correlated with  
534 performance. That is, a larger N2pc, typically associated with a stronger focusing onto the target  
535 and potentially reflecting better distractor suppression (Mazza et al. 2009; Donohue et al. 2016),  
536 might have compensated for the mind wandering.

537         When investigating MW, a major challenge is how to reliably capture phases of reduced  
538 focusing on the task. Frequently prompting thought probes during the course of the experiments  
539 will most likely discourage MW, hence, we chose to assess the participants mental state on only  
540 20% of the trials. As a consequence, trial numbers are inherently limited for comparing neural  
541 responses between mental states. Furthermore, participants reported for the majority of trials  
542 (51%) to be “on task”, which might be caused by the perceptually rather demanding  
543 discrimination task, or also be influenced by participants trying to respond in a socially desirable  
544 way. Nevertheless, the markers of local sleep (SWA increase, HFA reduction) match participants  
545 self-reports with being “off the task” and might also provide future measures depending less on  
546 self-report.

547         Our critical conclusion is that MW is strongly linked to cortical dynamics associated with  
548 local sleep and that attentional resources needed for visual search are upregulated to circumvent  
549 restrictions caused by limited sensory evidence. Occipital HFA, which shows a strong stimulus  
550 response comparable to intracranial recordings, falls out when participants have the subjective  
551 impression of being off the task, commensurate with an increase in periods of SWA increase.

552 Attentional decoupling as predicted for being off the task is expected to produce a decrease in the  
553 N2pc (Schad et al. 2012; Christoff et al. 2016). But reduced sensory evidence compels stronger  
554 attentional allocation to key features in the environment and hence a stronger target-distractor  
555 disambiguation during MW. Hence these results indicate that MW does not lead to a global  
556 blackout of HFA but cortical regions generating the target-distractor disambiguation also flexibly  
557 reacts to internal distractions. These functional explanations indicate that expected input to visual  
558 stimulation is tracked and stronger reallocation of spatial attention is generated when sensory  
559 evidence is scarce, presumably by frontal cortical areas. In sum, we provide evidence that MW is  
560 strongly related to local sleep and establish a direct link between boosted attentional resources  
561 due to local sleep during waking.

562

563

#### 564 **Acknowledgments**

565 This work was funded by ‘Schwerpunkt Neuroforschung. MW-21 LMSP 9-2012’, funded by  
566 Land Sachsen-Anhalt. C.R. was funded by the Federal Ministry of Education and Research,  
567 Germany, grant number 13GW0095D.

568

#### 569 **References**

- 570 Andrillon T, Windt J, Silk T, Drummond SPA, Bellgrove MA, Tsuchiya N. 2019. Does the Mind  
571 Wander When the Brain Takes a Break? Local Sleep in Wakefulness, Attentional Lapses  
572 and Mind-Wandering. *Front Neurosci.* 13:1–10.
- 573 Bartoli E, Bosking W, Li Y, Beauchamp MS, Yoshor D, Foster B. 2019. Distinct Narrow and  
574 Broadband Gamma Responses in Human Visual Cortex. *bioRxiv.* 572313.
- 575 Bellesi M, Riedner BA, Garcia-Molina GN, Cirelli C, Tononi G. 2014. Enhancement of sleep slow  
576 waves: Underlying mechanisms and practical consequences. *Front Syst Neurosci.* 8:1–17.
- 577 Bernardi G, Siclari F, Yu I, Zennig C, Bellesi M, Ricciardi E, Cirelli C, Ghilardi MF, Pietrini P,

578 Tononi G. 2015. Neural and behavioral correlates of extended training during sleep  
579 deprivation in humans: Evidence for local, task-specific effects. *J Neurosci.* 35:4487–4500.

580 Boehler CN, Tsotsos JK, Schoenfeld MA, Heinze H-J, Hopf J-M. 2011. Neural Mechanisms of  
581 Surround Attenuation and Distractor Competition in Visual Search. *J Neurosci.* 31:5213–  
582 5224.

583 Brainard DH. 1997. The Psychophysics Toolbox. *Spat Vis.* 10:433–436.

584 Brandmeyer T, Delorme A. 2018. Reduced mind wandering in experienced meditators and  
585 associated EEG correlates. *Exp Brain Res.* 236:2519–2528.

586 Burke JF, Long NM, Zaghoul KA, Sharan AD, Sperling MR, Kahana MJ. 2014. Human  
587 intracranial high-frequency activity maps episodic memory formation in space and time.  
588 *Neuroimage.* 85:834–843.

589 Carriere JSA, Cheyne JA, Smilek D. 2008. Everyday attention lapses and memory failures: The  
590 affective consequences of mindlessness. *Conscious Cogn.* 17:835–847.

591 Castelnovo A, Riedner BA, Smith RF, Tononi G, Boly M, Benca RM. 2016. Scalp and Source  
592 Power Topography in Sleepwalking and Sleep Terrors: A High-Density EEG Study. *Sleep.*  
593 39:1815–1825.

594 Christoff K, Irving ZC, Fox KCR, Spreng RN, Andrews-Hanna JR. 2016. Mind-wandering as  
595 spontaneous thought: a dynamic framework. *Nat Rev Neurosci.* 17:718–731.

596 Coon WG, Schalk G. 2016. A method to establish the spatiotemporal evolution of task-related  
597 cortical activity from electrocorticographic signals in single trials. *J Neurosci Methods.*  
598 271:76–85.

599 Crone N, Miglioretti DL, Gordon B, Lesser RP. 1998. Functional mapping of human sensorimotor  
600 cortex with electrocorticographic spectral analysis. II. Event-related synchronization in the  
601 gamma band. *Brain.* 121:2301–2315.

602 Donohue SE, Hopf J-M, Bartsch M V., Schoenfeld MA, Heinze H-J, Woldorff MG. 2016. The  
603 Rapid Capture of Attention by Rewarded Objects. *J Cogn Neurosci.* 28:529–541.

604 Dürschmid S, Edwards E, Reichert C, Dewar C, Hinrichs H, Heinze HJ, Kirsch HE, Dalal SS,

- 605 Deouell LY, Knight RT. 2016. Hierarchy of prediction errors for auditory events in human  
606 temporal and frontal cortex. *Proc Natl Acad Sci U S A*. 113:6755–6760.
- 607 Eimer M. 1996. The N2pc component as an indicator of attentional selectivity. *Electroencephalogr*  
608 *Clin Neurophysiol*. 99:225–234.
- 609 Finelli LA, Baumann H, Borbély AA, Achermann P. 2000. Dual electroencephalogram markers of  
610 human sleep homeostasis: Correlation between theta activity in waking and slow-wave  
611 activity in sleep. *Neuroscience*. 101:523–529.
- 612 Forster S, Lavie N. 2014. Distracted by your mind? Individual differences in distractibility predict  
613 mind wandering. *J Exp Psychol Learn Mem Cogn*. 40:251–260.
- 614 Gaspar JM, McDonald JJ. 2014. Suppression of salient objects prevents distraction in visual  
615 search. *J Neurosci*. 34:5658–5666.
- 616 Gerber EM, Golan T, Knight RT, Deouell LY. 2017. Cortical representation of persistent visual  
617 stimuli. *Neuroimage*. 161:67–79.
- 618 Golan T, Davidesco I, Meshulam M, Groppe DM, Mégevand P, Yeagle EM, Goldfinger MS, Harel  
619 M, Melloni L, Schroeder CE, Deouell LY, Mehta AD, Malach R. 2016. Human intracranial  
620 recordings link suppressed transients rather than “filling-in” to perceptual continuity across  
621 blinks. *Elife*. 5:1–28.
- 622 Golan T, Davidesco I, Meshulam M, Groppe DM, Mégevand P, Yeagle EM, Goldfinger MS, Harel  
623 M, Melloni L, Schroeder CE, Deouell LY, Mehta AD, Malach R. 2017. Increasing  
624 suppression of saccade-related transients along the human visual hierarchy. *Elife*. 6:1–15.
- 625 He J, Becic E, Lee YC, McCarley JS. 2011. Mind wandering behind the wheel: Performance and  
626 oculomotor correlates. *Hum Factors*. 53:13–21.
- 627 Helfrich RF, Fiebelkorn IC, Szczepanski SM, Lin JJ, Parvizi J, Knight RT, Kastner S. 2018. Neural  
628 Mechanisms of Sustained Attention Are Rhythmic. *Neuron*. 99:854-865.e5.
- 629 Hickey C, Di Lollo V, McDonald JJ. 2009. Electrophysiological indices of target and distractor  
630 processing in visual search. *J Cogn Neurosci*. 21:760–775.
- 631 Hilimire MR, Hickey C, Corballis PM. 2012. Target resolution in visual search involves the direct

- 632 suppression of distractors: Evidence from electrophysiology. *Psychophysiology*. 49:504–  
633 509.
- 634 Hilimire MR, Mounts JRW, Parks NA, Corballis PM. 2011. Dynamics of target and distractor  
635 processing in visual search: Evidence from event-related brain potentials. *Neurosci Lett*.  
636 495:196–200.
- 637 Hopf J-M, Luck SJ, Girelli M, Hagner T, Mangun GR, Scheich H, Heinze H-J. 2000. Neural  
638 Sources of Focused Attention in Visual Search. *Cereb Cortex*. 10:1233–1241.
- 639 Huber R, Felice Ghilardi M, Massimini M, Tononi G. 2004. Local sleep and learning. *Nature*.  
640 430:78–81.
- 641 Hung C-S, Sarasso S, Ferrarelli F, Riedner B, Ghilardi MF, Cirelli C, Tononi G. 2013. Local  
642 Experience-Dependent Changes in the Wake EEG after Prolonged Wakefulness. *Sleep*.  
643 36:59–72.
- 644 Kam JWY, Dao E, Farley J, Fitzpatrick K, Smallwood J, Schooler JW, Handy TC. 2011. Slow  
645 fluctuations in attentional control of sensory cortex. *J Cogn Neurosci*. 23:460–470.
- 646 Kam JWY, Solbakk AK, Endestad T, Meling TR, Knight RT. 2018. Lateral prefrontal cortex lesion  
647 impairs regulation of internally and externally directed attention. *Neuroimage*. 175:91–99.
- 648 Kleiner M, Brainard D, Pelli D, Ingling A, Murray R, Broussard C. 2007. What 's new in  
649 Psychtoolbox-3 ?
- 650 Kucyi A, Salomons T V., Davis KD. 2013. Mind wandering away from pain dynamically engages  
651 antinociceptive and default mode brain networks. *Proc Natl Acad Sci*. 110:18692–18697.
- 652 Kupers E, Wang H, Amano K, Kay K, Heeger D, Winawer J. 2017. A non-invasive, quantitative  
653 study of broadband spectral responses in human visual cortex. *Broadband Spectr*  
654 responses Vis cortex Reveal by a new MEG denoising algorithm. 108993.
- 655 Lee B, Martin P, Valberg A. 1988. The physiological basis of heterochromatic flicker photometry.  
656 *J Physiol*. 323–347.
- 657 Leemburg S, Vyazovskiy V V., Olcese U, Bassetti CL, Tononi G, Cirelli C. 2010. Sleep  
658 homeostasis in the rat is preserved during chronic sleep restriction. *Proc Natl Acad Sci U S*

- 659 A. 107:15939–15944.
- 660 Leszczynski M, Chaieb L, Reber TP, Derner M, Axmacher N, Fell J. 2017. Mind wandering  
661 simultaneously prolongs reactions and promotes creative incubation. *Sci Rep.* 7:1–9.
- 662 Liu J, Newsome WT. 2006. Local field potential in cortical area MT: Stimulus tuning and  
663 behavioral correlations. *J Neurosci.* 26:7779–7790.
- 664 Luck SJ. 2005. *An Introduction to the Event-Related Potential Technique.* Cambridge, MA: MIT  
665 Press.
- 666 Luck SJ, Girelli M, McDermott MT, Ford MA. 1997. Bridging the Gap between Monkey  
667 Neurophysiology and Human Perception: An Ambiguity Resolution Theory of Visual  
668 Selective Attention, *Cognitive Psychology.*
- 669 Luck SJ, Hillyard SA. 1994a. Electrophysiological correlates of feature analysis during visual  
670 search. *Psychophysiology.* 31:291–308.
- 671 Luck SJ, Hillyard SA. 1994b. Spatial Filtering During Visual Search: Evidence From Human  
672 Electrophysiology. *J Exp Psychol Hum Percept Perform.* 20:1000–1014.
- 673 Manning JR, Jacobs J, Fried I, Kahana MJ. 2009. Broadband Shifts in Local Field Potential  
674 Power Spectra Are Correlated with Single-Neuron Spiking in Humans. 29:13613–13620.
- 675 Mazza V, Turatto M, Caramazza A. 2009. Attention selection, distractor suppression and N2pc.  
676 *CORTEX.* 45:879–890.
- 677 Miller KJ, denNijs M, Shenoy P, Miller JW, Rao RPN, Ojemann JG. 2007. Real-time functional  
678 brain mapping using electrocorticography. *Neuroimage.* 37:504–507.
- 679 Miller KJ, Honey CJ, Hermes D, Rao RPN, DenNijs M, Ojemann JG. 2014. Broadband changes  
680 in the cortical surface potential track activation of functionally diverse neuronal populations.  
681 *Neuroimage.* 85:711–720.
- 682 Miller KJ, Sorensen LB, Ojemann JG, Den Nijs M. 2009. Power-law scaling in the brain surface  
683 electric potential. *PLoS Comput Biol.* 5.
- 684 Mukamel R, Gelbard H, Arieli A, Hasson U, Fried I, Malach R. 2005. Neuroscience: Coupling  
685 between neuronal firing, field potentials, and fMRI in human auditory cortex. *Science (80- ).*

686 309:951–954.

687 Murphy M, Huber R, Esser S, A. Riedner B, Massimini M, Ferrarelli F, Felice Ghilardi M, Tononi  
688 G. 2011. The Cortical Topography of Local Sleep. *Curr Top Med Chem.* 11:2438–2446.

689 Müsch K, Hamamé CM, Perrone-Bertolotti M, Minotti L, Kahane P, Engel AK, Lachaux JP,  
690 Schneider TR. 2014. Selective attention modulates high-frequency activity in the face-  
691 processing network. *Cortex.* 60:34–51.

692 Nir Y, Andrillon T, Marmelshtein A, Suthana N, Cirelli C, Tononi G, Fried I. 2017. Selective  
693 neuronal lapses precede human cognitive lapses following sleep deprivation. *Nat Med.*  
694 23:1474–1480.

695 Pelli DG. 1997. The VideoToolbox software for visual psychophysics: transforming numbers into  
696 movies. *Spat Vis.* 10:437–442.

697 Perrone-Bertolotti M, El Bouzaïdi Tiali S, Vidal JR, Petton M, Croize AC, Deman P, Rheims S,  
698 Minotti L, Bhattacharjee M, Baciú M, Kahane P, Lachaux JP. 2020. A real-time marker of  
699 object-based attention in the human brain. A possible component of a “gate-keeping  
700 mechanism” performing late attentional selection in the Ventro-Lateral Prefrontal Cortex.  
701 *Neuroimage.* 210:116574.

702 Privman E, Malach R, Yeshurun Y. 2013. Modeling the electrical field created by mass neural  
703 activity. *Neural Networks.* 40:44–51.

704 Quercia A, Zappasodi F, Committeri G, Ferrara M. 2018. Local use-dependent sleep in  
705 wakefulness links performance errors to learning. *Front Hum Neurosci.* 12:1–17.

706 Ray S, Maunsell JHR. 2011. Different Origins of Gamma Rhythm and High-Gamma Activity in  
707 Macaque Visual Cortex. *PLoS Biol.* 9:e1000610.

708 Rector DM, Schei JL, Van Dongen HPA, Belenky G, Krueger JM. 2009. Physiological markers of  
709 local sleep. *Eur J Neurosci.* 29:1771–1778.

710 Schad DJ, Nuthmann A, Engbert R. 2012. Your mind wanders weakly, your mind wanders  
711 deeply: Objective measures reveal mindless reading at different levels. *Cognition.* 125:179–  
712 194.

- 713 Seli P. 2016. The Attention-Lapse and Motor Decoupling accounts of SART performance are not  
714 mutually exclusive. *Conscious Cogn.* 41:189–198.
- 715 Siclari F, Baird B, Perogamvros L, Bernardi G, LaRocque JJ, Riedner B, Boly M, Postle BR,  
716 Tononi G. 2017. The neural correlates of dreaming. *Nat Neurosci.* 20:872–878.
- 717 Smallwood J, Beach E, Schooler JW, Handy TC. 2008. Going AWOL in the Brain: Mind  
718 Wandering Reduces Cortical Analysis of External Events. *J Cogn Neurosci.* 20:458–469.
- 719 Smallwood J, Schooler JW. 2006. The restless mind. *Psychol Bull.* 132:946–958.
- 720 Szczepanski SM, Crone NE, Kuperman RA, Auguste KI, Parvizi J, Knight RT. 2014. Dynamic  
721 Changes in Phase-Amplitude Coupling Facilitate Spatial Attention Control in Fronto-Parietal  
722 Cortex. *PLoS Biol.* 12:e1001936.
- 723 Szczepanski SM, Kastner S. 2013. Shifting Attentional Priorities: Control of Spatial Attention  
724 through Hemispheric Competition. *J Neurosci.* 33:5411–5421.
- 725 Szczepanski SM, Knight RT. 2014. Insights into Human Behavior from Lesions to the Prefrontal  
726 Cortex. *Neuron.* 83:1002–1018.
- 727 Unsworth N, McMillan BD. 2014. Similarities and differences between mind-wandering and  
728 external distraction: A latent variable analysis of lapses of attention and their relation to  
729 cognitive abilities. *Acta Psychol (Amst).* 150:14–25.
- 730 Vyazovskiy V V., Harris KD. 2013. Sleep and the single neuron: The role of global slow  
731 oscillations in individual cell rest. *Nat Rev Neurosci.* 14:443–451.
- 732 Vyazovskiy V V, Olcese U, Hanlon EC, Nir Y, Cirelli C, Tononi G. 2011. Local sleep in awake  
733 rats. *Nature.* 472:443–447.
- 734 Weissman DH, Roberts KC, Visscher KM, Woldorff MG. 2006. The neural bases of momentary  
735 lapses in attention. *Nat Neurosci.* 9:971–978.
- 736 Westner BU, Dalal SS, Hanslmayr S, Staudigl T. 2018. Across-subjects classification of stimulus  
737 modality from human MEG high frequency activity. *PLoS Comput Biol.* 14:1–14.
- 738 Yanko MR, Spalek TM. 2014. Driving with the wandering mind: The effect that mind-wandering  
739 has on driving performance. *Hum Factors.* 56:260–269.



740
